# Supplementary material
Source: PubMed Central journal article supplement (PMC6398937)
Supplement: NIHMS1001141-supplement-Supplemental_Table_Legends.pdf [file NIHMS1001141-supplement-Supplemental_Table_Legends.pdf]

## **Supplemental Table Legends**

**Table S1. Protein-coding gene expression over 52 hours in pH 7.4 and 6.3 at 4-hour intervals. Related to Figures 3 and S3.**

Rank order of genes as in Figure 3E. See also legends for Tables S5 and S6.

**Table S2. ARSER tests of circadian rhythmicity of pH 7.4 and pH 6.3 expression. Related to Figures 3A-D, and S3B-C.**

**Table S3. Expression of transcripts circadian in pH 7.4. Corresponds to Figure 3A.**

Transcripts ranked by phase of oscillation in pH 7.4. Same rank order in corresponding heatmap (Figure 3A).

**Table S4. Expression of transcripts circadian in pH 6.3. Corresponds to Figure S3B.**

Transcripts ranked by phase of oscillation in pH 6.3. Same rank order in corresponding heatmap (Figure S3B).

**Table S5. Transcripts induced in acid. Corresponds to Figures 3E and 3F.**

Defined as  $\log_2$  of the ratio of the average expression over all 13 time points (4h-52h) in pH 6.3 to pH 7.4 (see column AC of Table S1) greater than 1. Ranked by most induced. Same rank order of genes in corresponding heatmap (Figure 3F).

**Table S6. Transcripts suppressed in acid. Corresponds to Figures 3E and 3G.**

Defined as  $\log_2$  of the ratio of the average expression over all 13 time points (4h-52h) in pH 6.3 to pH 7.4 (see column AC of Table S1) less than -1. Ranked by most suppressed. Same rank order of genes in corresponding heatmap (Figure 3G).

**Table S7. qPCR primers and DsiRNA oligos. Related to STAR Methods.**
